# Supplementary material
Source: publisher figshare collection journal article supplement (https://brill.figshare.com/articles/dataset/_/17111417)
Supplement: Supplementary file 1 [file 1]

# **Reducing Cybersickness in 360-degree Virtual Reality**

**Iqra Arshad <sup>1</sup>, Paulo De Mello <sup>2,\*</sup>, Martin Ender <sup>2,\*\*</sup>, Jason D. McEwen <sup>2,\*\*\*</sup> and Elisa R. Ferré <sup>1,3,\*\*\*\*</sup>**

<sup>1</sup> Department of Psychology, Royal Holloway University of London, Egham, TW20 0EX,  
UK

<sup>2</sup> Kagenova Limited, Guildford, GU5 9LD, UK

<sup>3</sup> Department of Psychological Sciences, Birkbeck University of London, London, WC1E  
7HX, UK

Received 5 March 2021; accepted 24 November 2021

\* ORCID: 0000-0001-7170-8290

\*\* ORCID: 0000-0001-9697-0631

\*\*\* ORCID: 0000-0002-5852-8890

\*\*\*\* To whom correspondence should be addressed. E-mail: [elisa.ferre@bbk.ac.uk](mailto:elisa.ferre@bbk.ac.uk)

## **Supplementary Material**
